# Supplementary material for: LncRNA NEAT1/miR-146a-5p Axis Restores Normal Angiogenesis in Diabetic Foot Ulcers by Targeting mafG
Source: MDPI journal article supplement (doi:10.3390/cells13050456), 2024-03-05
Supplement: s1 [file s1]

**Epigenetic Regulation by the lncRNA NEAT1/miR-146a-5p Axis in Restoring Normal  
Angiogenesis through MafG Targeting in Diabetic Foot Ulcers**

TCA Architha<sup>1</sup>, George Raj Juanitaa<sup>1</sup>, Ramanarayanan Vijayalalitha<sup>1</sup>, Ravichandran  
Jayasuriya<sup>1</sup>, Gopinathan Athira<sup>2</sup>, R Balamurugan<sup>2</sup>, Kunka Mohanram Ramkumar<sup>1,\*</sup>

<sup>1</sup>Department of Biotechnology, School of Bioengineering, SRM Institute of Science and  
Technology, Kattankulathur 603 203, Tamil Nadu, India.

<sup>2</sup>SRM Medical Hospital and Research Centre, SRM Institute of Science and Technology,  
Kattankulathur 603 203, Tamil Nadu, India.

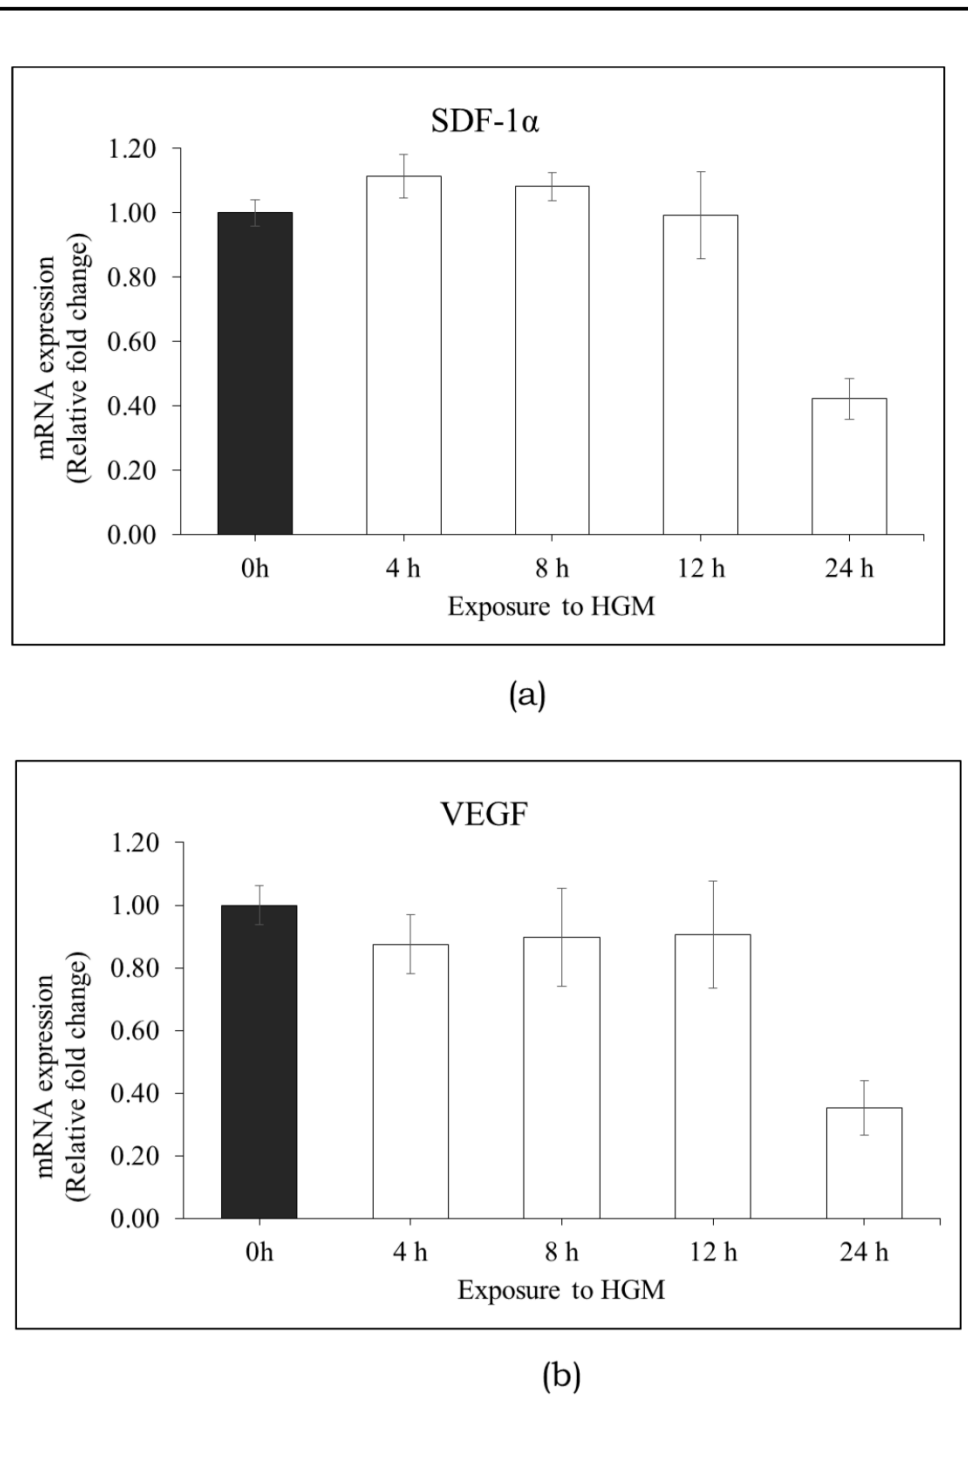

Figure S1: Expression of angiogenic markers such as SDF-1α (a) and VEGF (b) in HGM-induced endothelial cells at different time intervals.
